# Supplementary material
Source: HighWire-hosted journal article supplement (http://molpharm.aspetjournals.org/highwire/filestream/76922/field_highwire_adjunct_files/0/FigS1.pdf)
Supplement: FigS1.pdf [file FigS1.pdf]

**Marilyne Labasque, Julie Meffre, Gaele Carrat, Carine Becamel, Joël Bockaert and Philippe Marin. Constitutive Activity of Serotonin<sub>2C</sub> Receptors at G Protein-Independent Signaling: Modulation by RNA Editing and Antidepressants. Molecular Pharmacology.**

**Supplemental data: Fig. S1**

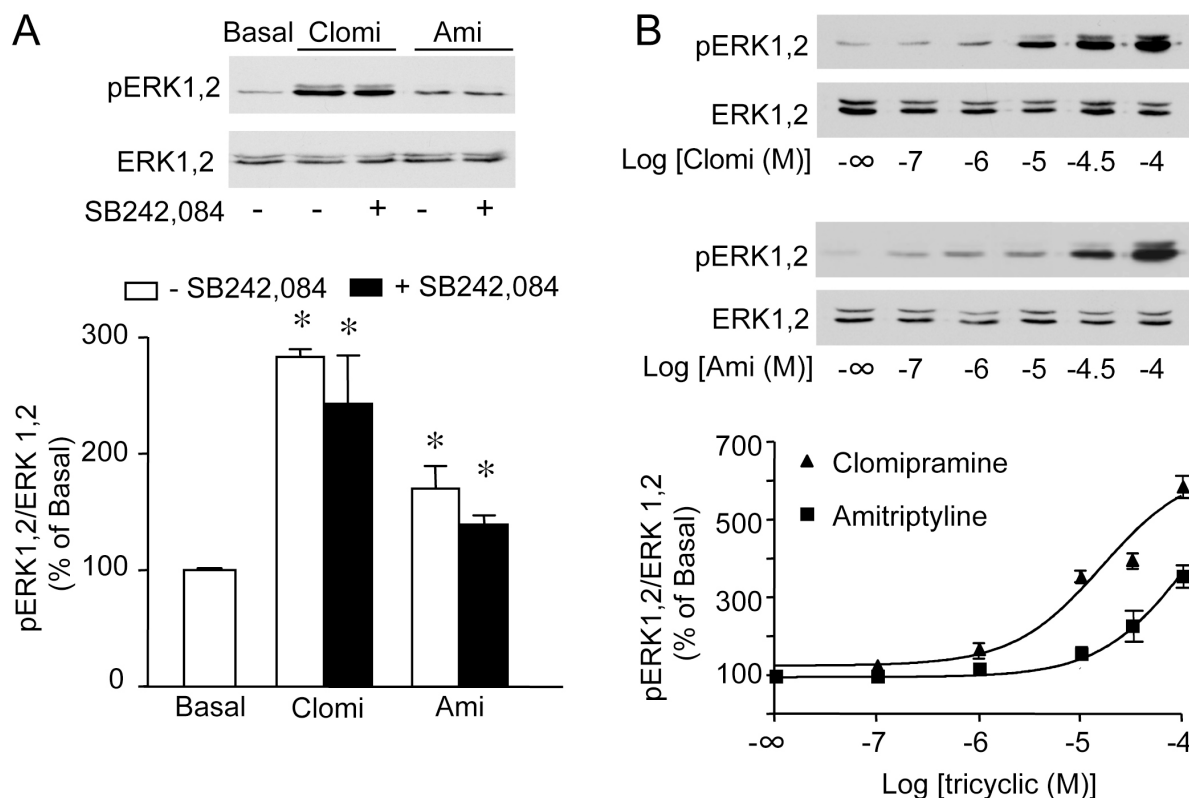

**Fig. S1.** Tricyclics activate ERK1,2 signaling independently of 5-HT<sub>2C</sub> receptor stimulation. (A) HEK-293 cells, transfected with pRK5/cMyc-5-HT<sub>2C</sub>-INI plasmid, were pretreated or not with SB242,084 (1  $\mu$ M, 10 min) and then exposed for 10 min to either sham treatment (Basal) or clomipramine (Clomi, 10  $\mu$ M) or amitriptyline (Ami, 30  $\mu$ M). (B) Non-transfected HEK-293 cells were exposed for 10 min to increasing concentrations of clomipramine or amitriptyline. Dose-response curves were fitted using the Prism software. ERK1,2 phosphorylation was analyzed as indicated in the legend to Fig. 1. Values, normalized to total ERK immunoreactivity, are means  $\pm$  SEM of results obtained in three independent experiments performed on different sets of cultured cells. \*,  $p < 0.01$ , vs. basal ERK1,2 phosphorylation.
